# Supplementary material for: NT5C2 novel splicing variant expands the phenotypic spectrum of Spastic Paraplegia (SPG45): case report of a new member of thin corpus callosum SPG-Subgroup
Source: Springer Nature journal article supplement (doi:10.1186/s12881-017-0395-6), 2017-03-21
Supplement: MOESM1 [file 12164976]

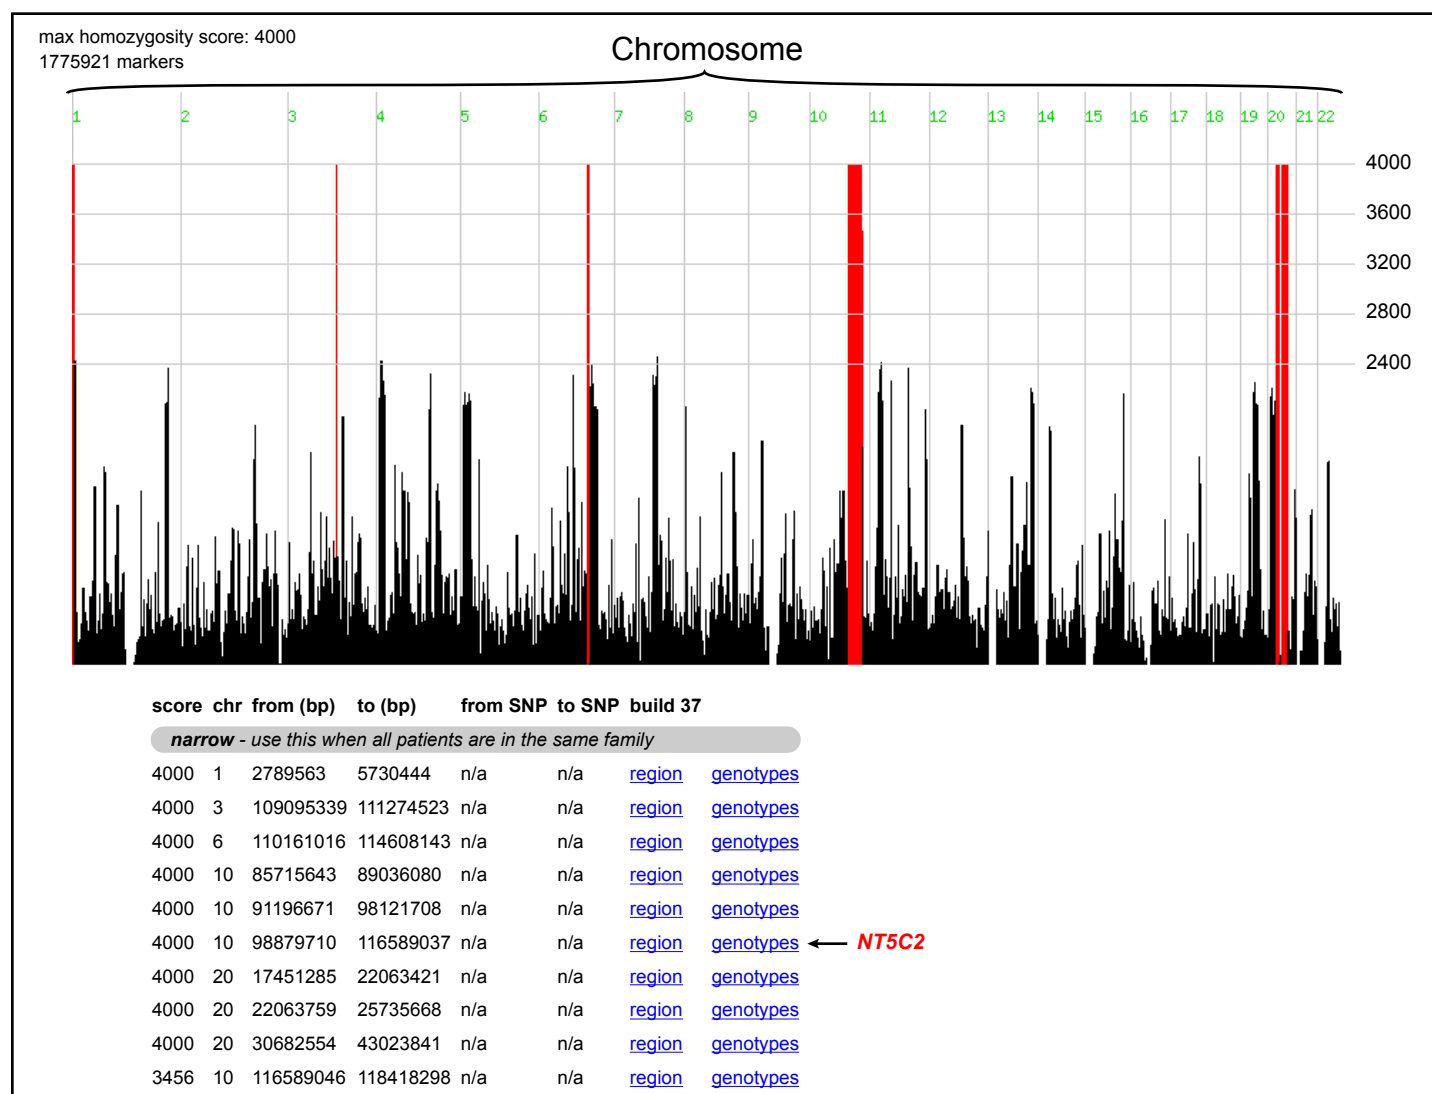

**Figure S2:** Snapshot of Homozygosity Mapper Analysis of WGS SNPs data. The numbers on top represent each of the chromosomes. The numbers on the right indicate the score. The Analysis shows homozygosity blocks on multiple chromosomes, 1,3,6,10, and 20. The homozygosity peak on chromosome 10 encompassing *NT5C2* locus.

Multiple chromosomes with multiple significant homozygosity blocks is the common picture we encountered in consanguineous families with consanguineous marriages over multiple generations.
